# Supplementary material for: Emerging investigator series: microplastic sources, fate, toxicity, detection, and interactions with micropollutants in aquatic ecosystems – a review of reviews
Source: Royal Society of Chemistry journal article supplement (doi:10.1039/d1em00443c), 2022-01-01
Supplement: d1em00443c1.pdf [file d1em00443c1.pdf]

SUPPORTING INFORMATION

**Microplastics Sources, Fate, Toxicity, Detection, and Interactions with  
Micropollutants in Aquatic Ecosystems – A Review of Reviews**

Mohamed Ateia <sup>a,\*</sup>,<sup>1</sup>, Gamze Ersan <sup>b,1</sup>, Mohamed Gar Alalm <sup>c,1</sup>, Daria-Camilla Boffito <sup>c</sup>,  
Tanju Karanfil <sup>a,\*</sup>

<sup>a</sup> *United States Environmental Protection Agency, Center for Environmental Solutions & Emergency Response, Cincinnati, OH, USA*

<sup>b</sup> *Department of Environmental Engineering and Earth Sciences, Clemson University, Anderson, SC 29625, USA*

<sup>c</sup> *Department of Chemical Engineering, Polytechnique Montréal, C.P. 6079, Succ. CV Montréal, H3C 3A7 Québec, Canada*

<sup>1</sup> *These authors contributed equally*

---

---

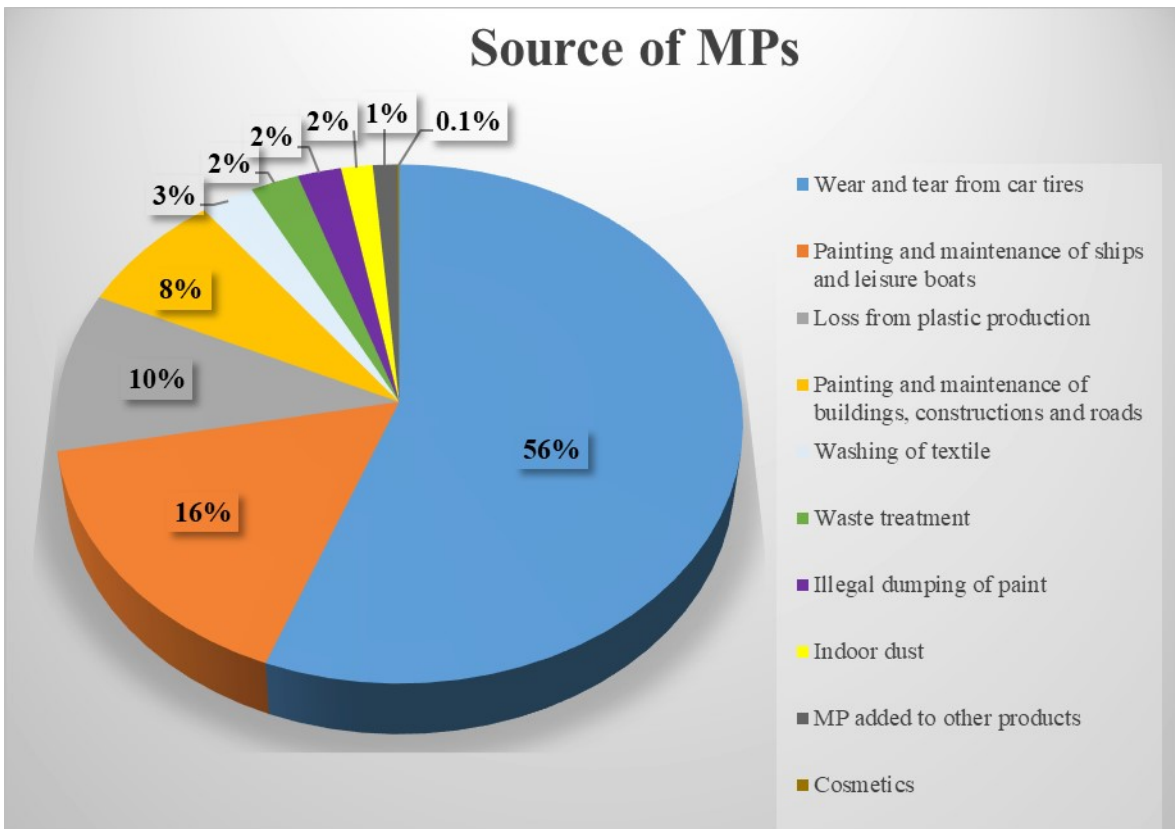

**Fig. S1.** Source of MPs pollution to the aquatic systems. \*Source: The report is based on the Mepex report on MPs pollution sources in the last half decades.

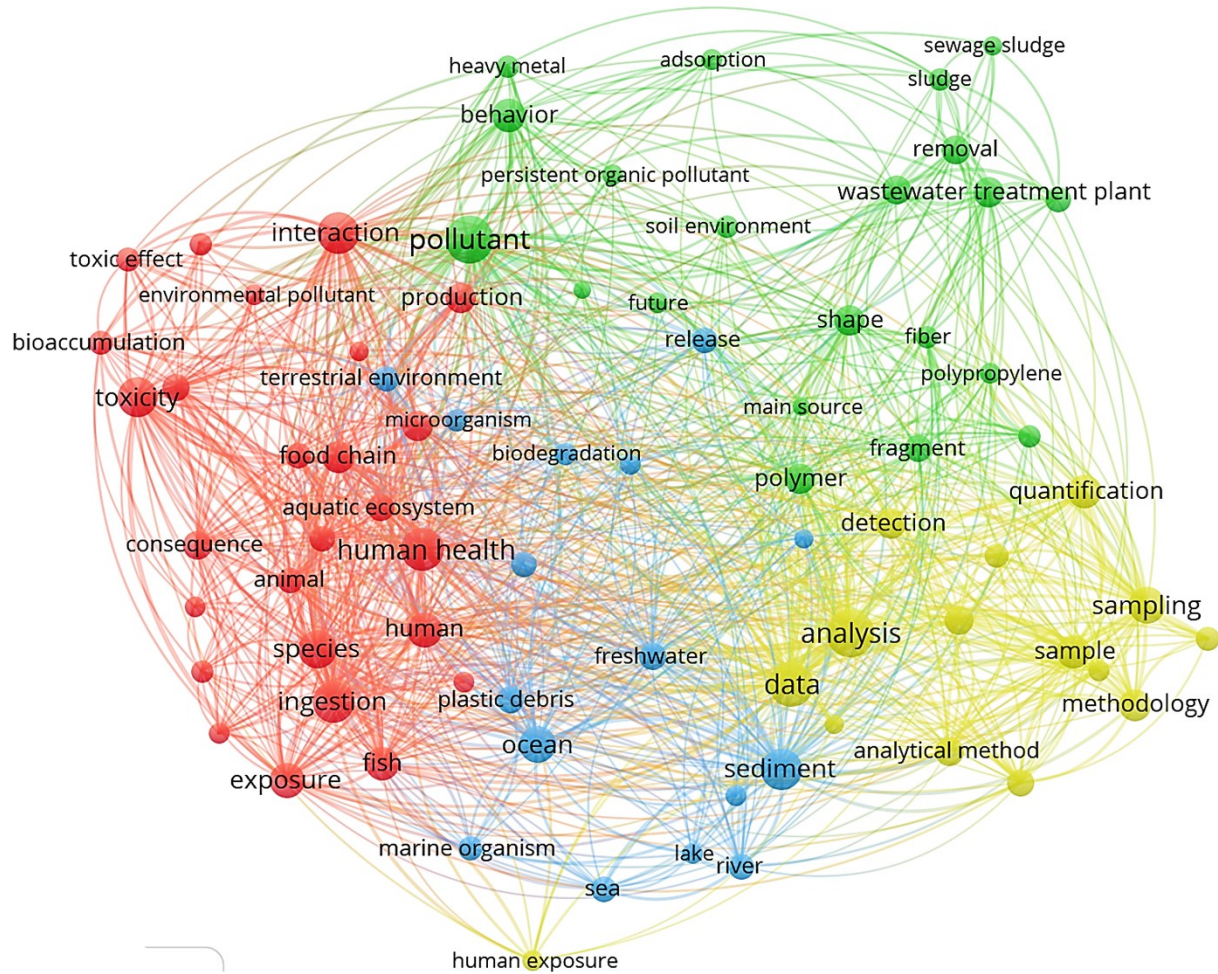

**Fig. 2.** Network for the most common expressions and research areas in published review studies on microplastics using the Scopus database in September 2021.

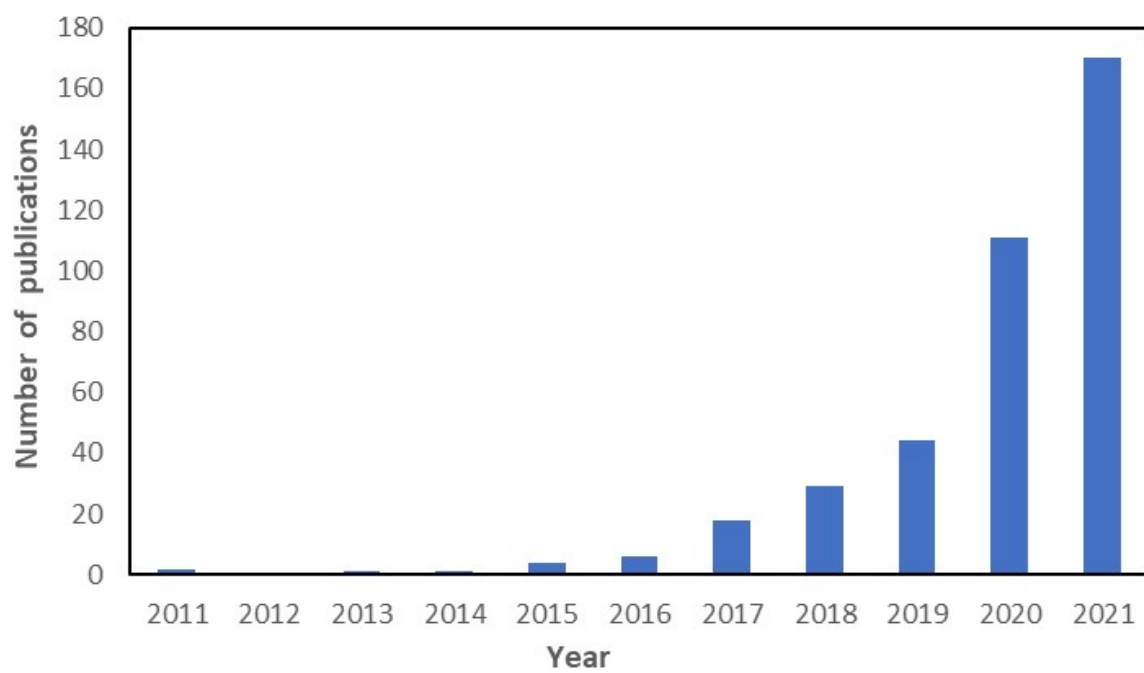

**Fig. S3.** Numbers of MPs review articles in the last decade indexed by Scopus ® as of August 2021.
